# Supplementary material for: Temporal Sensory Perceptions of Sugar-Reduced 3D Printed Chocolates
Source: MDPI journal article supplement (doi:10.3390/foods10092082), 2021-09-03
Supplement: s1 [file s1]

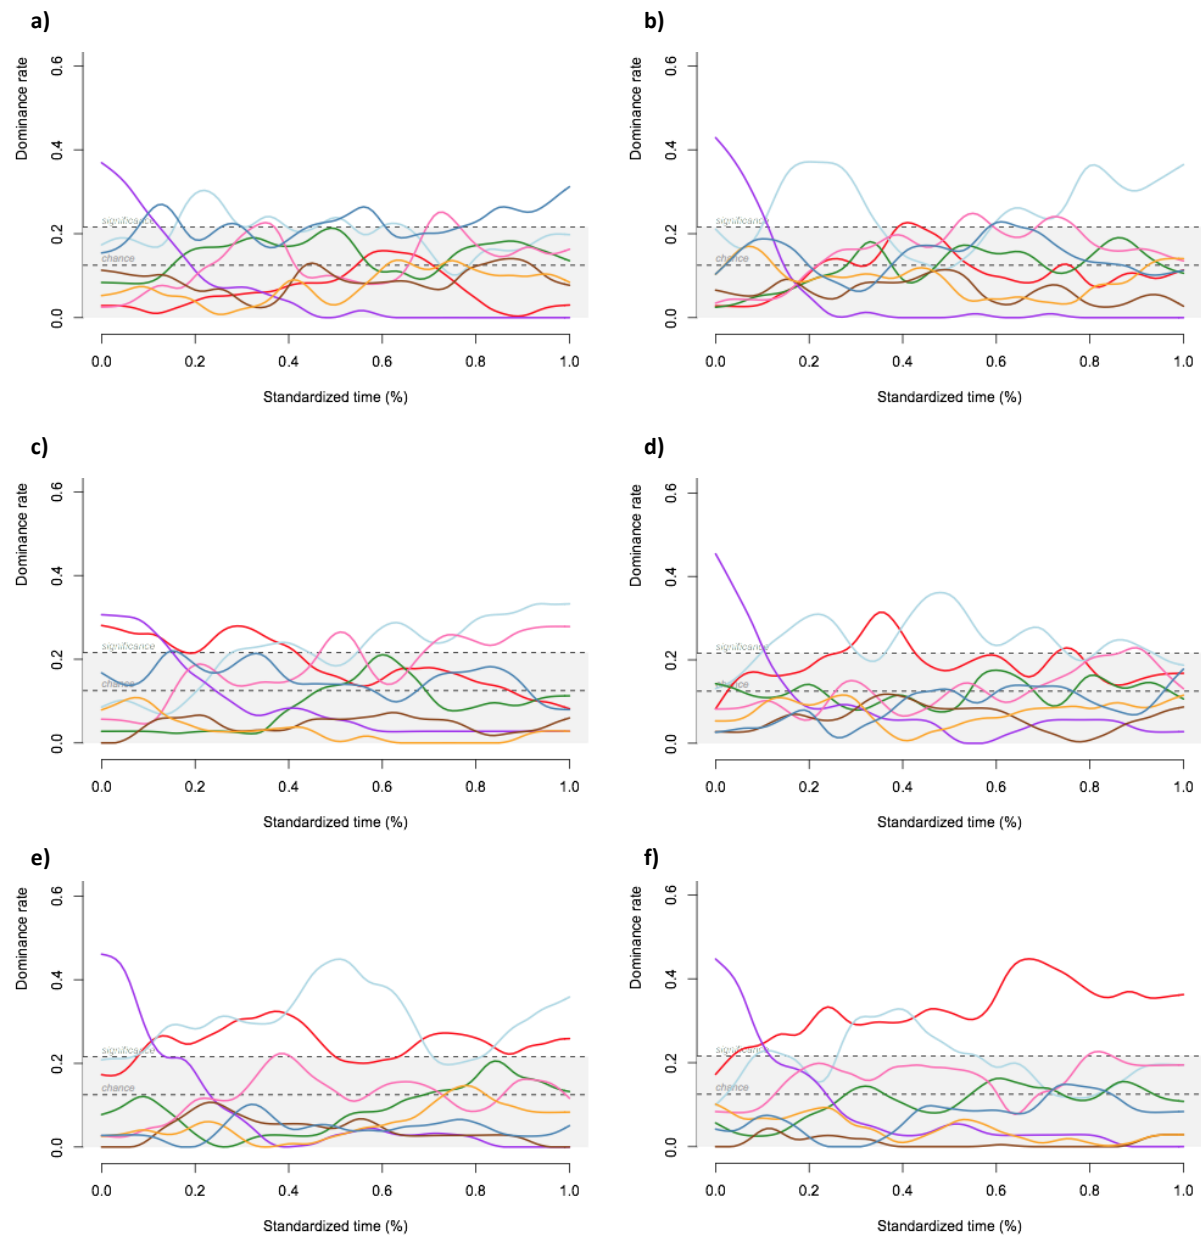

**Figure S1.** TDS curves for each 3D printed chocolate sample: **a)** HHH **b)** HLH **c)** HHL **d)** LHL **e)** HLL **f)** LLL. Colored lines represent: Bitter, Chocolate flavor, Melting, Milky flavor, Creamy, Soft, Hard/Brittle, Sweet.

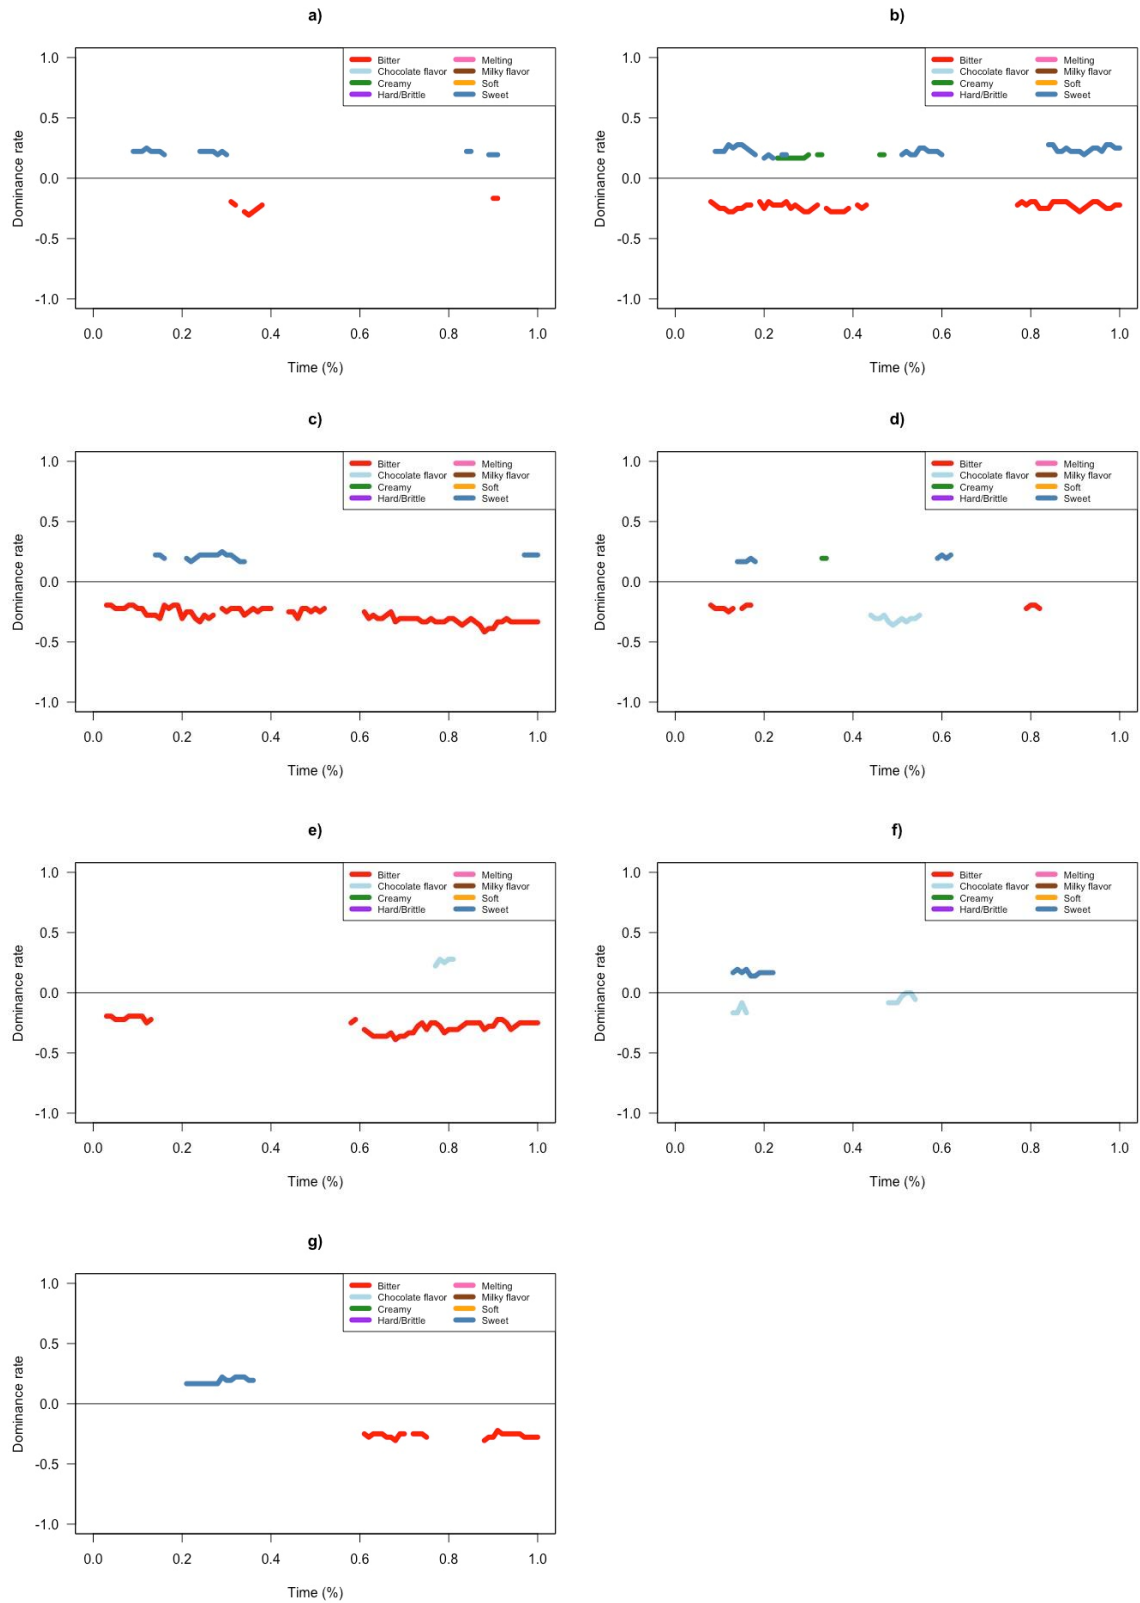

**Figure S2.** TDS difference curves comparing samples with significantly different sweetness: **a)** HHH-LHL **b)** HHH-LLL **c)** HHH-LLL **d)** HLH-HLL **e)** HLH-LLL **f)** HHL-HLL **g)** HHL-LLL
